# Supplementary material
Source: HighWire-hosted journal article supplement (https://qualitysafety.bmj.com/highwire/filestream/147646/field_highwire_adjunct_files/4/bmjqs-2015-004828supp_appendix5.pdf)

# Classification of adverse events excluding operation-related events for medical and surgical specialties

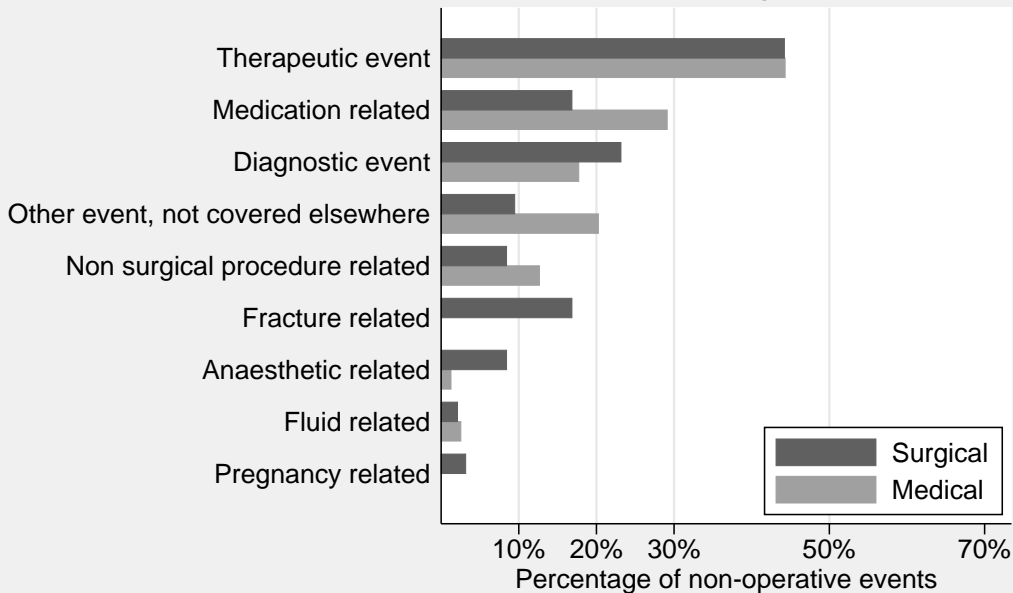

Supplement: bmjqs-2015-004828supp_appendix5.pdf [file bmjqs-2015-004828supp_appendix5.pdf]
